# Supplementary figures and images for: Transcriptomic assessment of resistance to effects of an aryl hydrocarbon receptor (AHR) agonist in embryos of Atlantic killifish (Fundulus heteroclitus) from a marine Superfund site
Source: Springer Nature journal article supplement (doi:10.1186/1471-2164-12-263), 2011-05-24

Figure S1

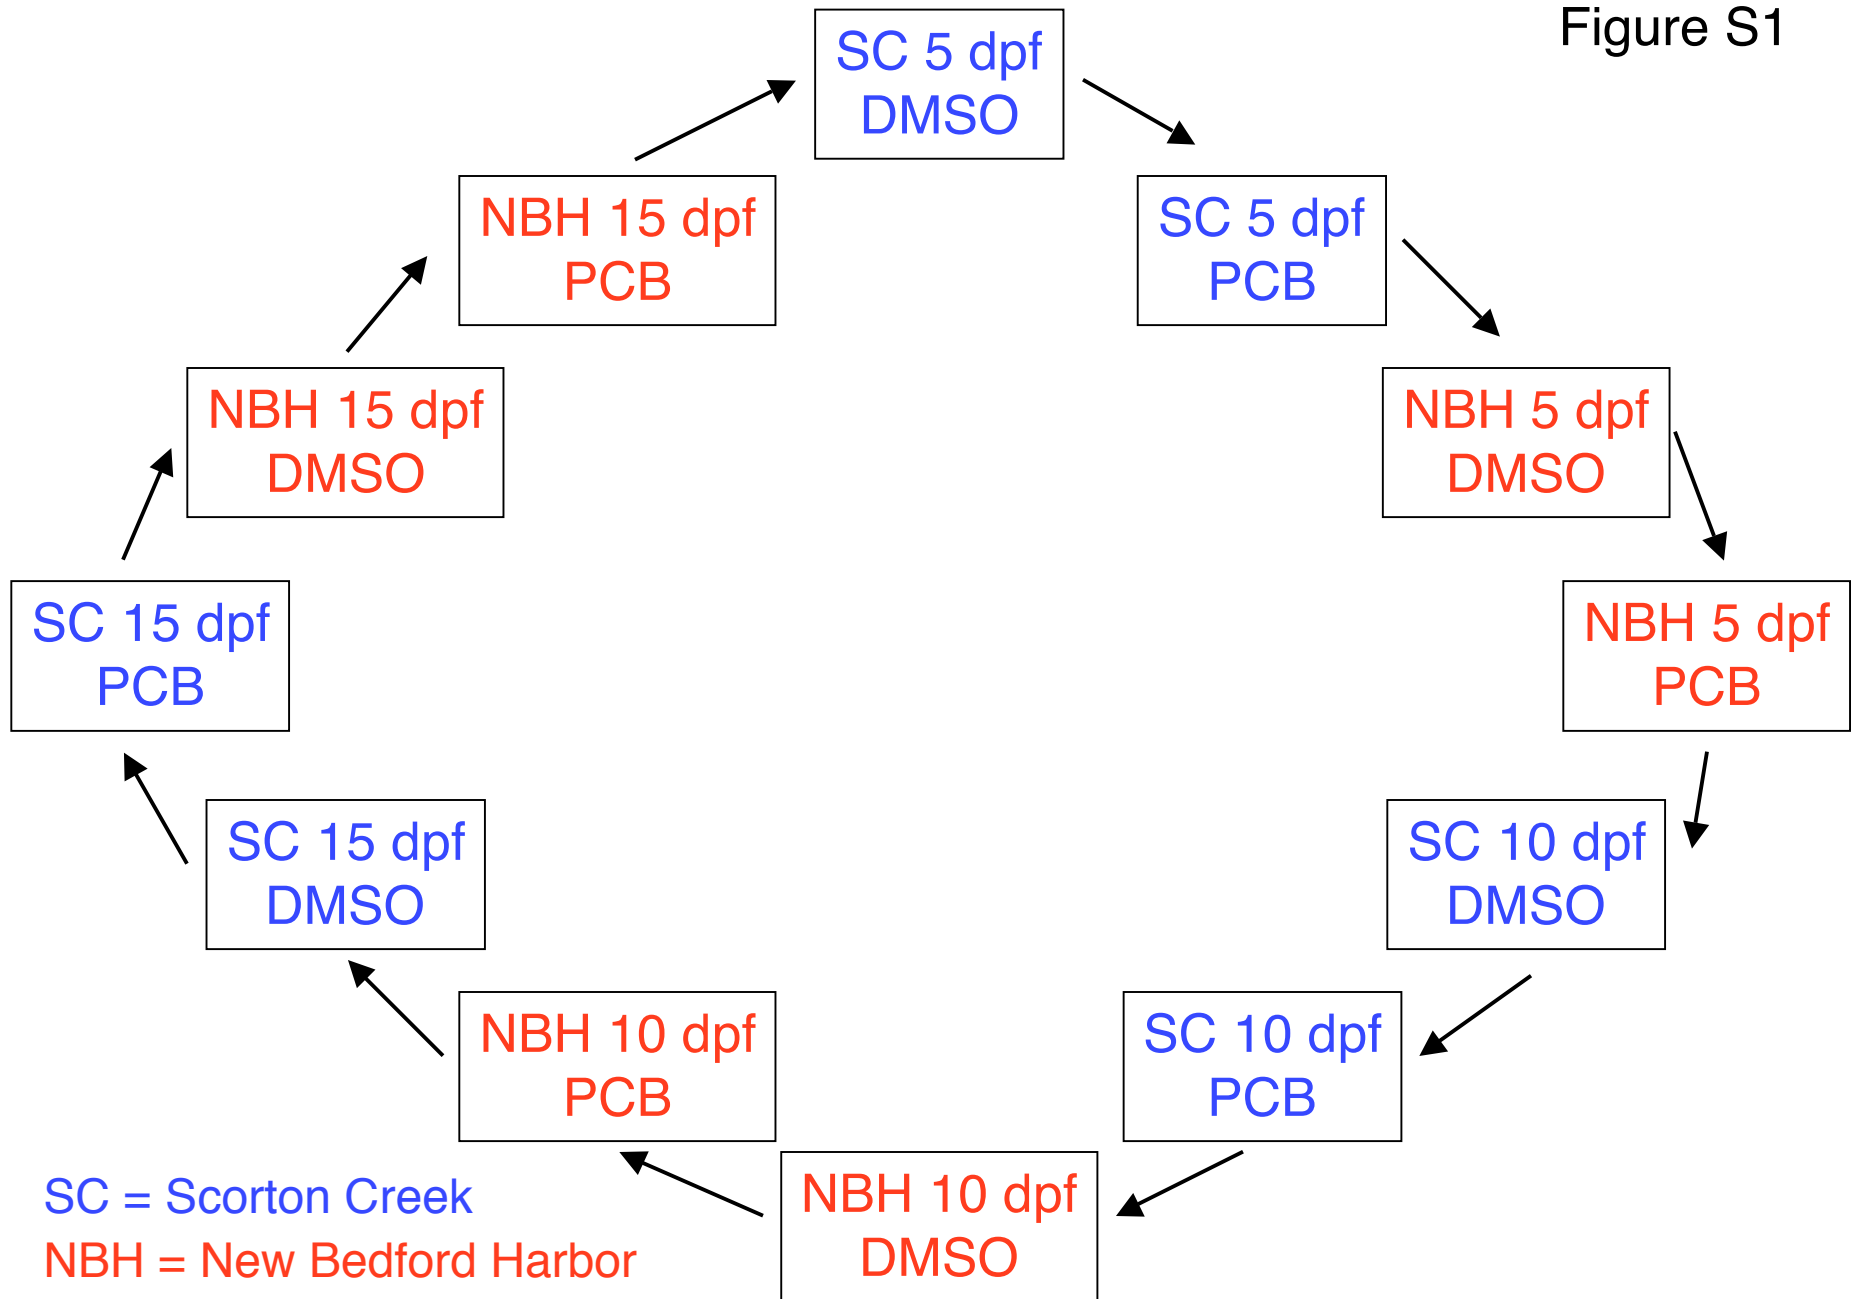

Supplement: Additional file 1 [file 1471-2164-12-263-s1.pdf]
